# Supplementary material for: A polo-like kinase inhibitor identified by computational repositioning attenuates pulmonary fibrosis
Source: PubMed Central journal article supplement (PMC10236721; doi:10.1186/s12931-023-02446-x), 2023-06-02
Supplement: 12931_2023_2446_MOESM2_ESM.pdf [file 12931_2023_2446_MOESM2_ESM.pdf]

A

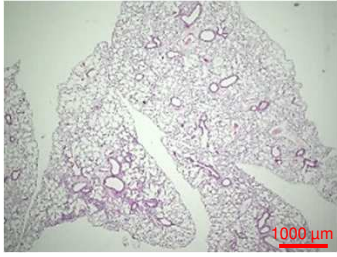

Control

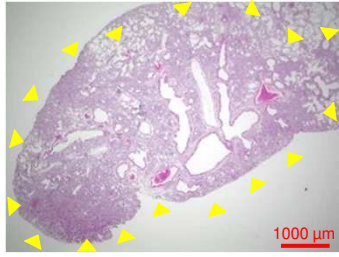

Bleomycin

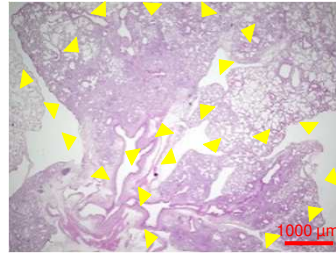

Bleomycin  
+BI2536 5 mg/kg

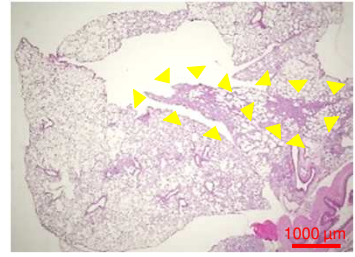

Bleomycin  
+BI2536 10 mg/kg

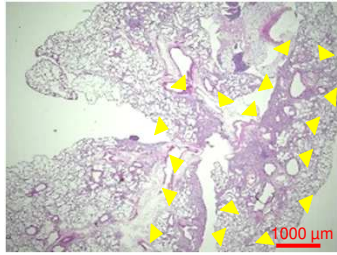

Bleomycin  
+BI2536 20 mg/kg

B

$P < 0.0001$

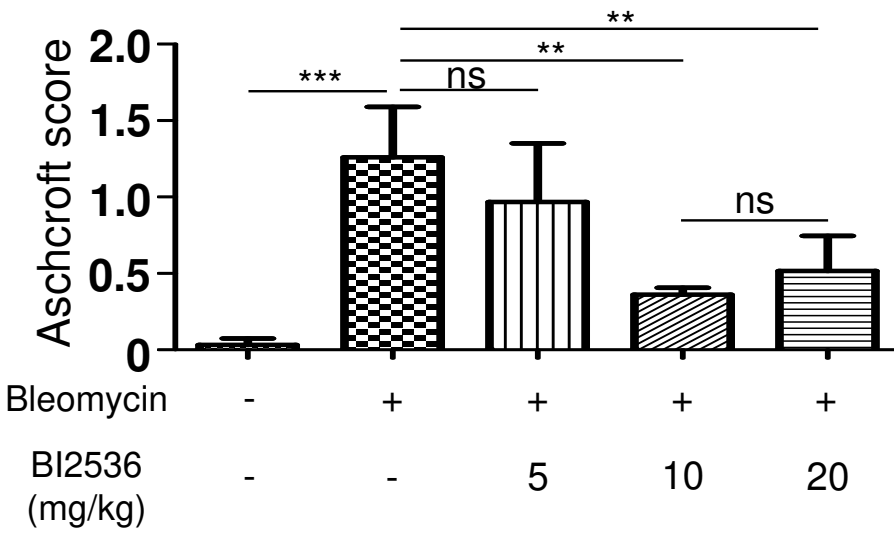

Figure E1

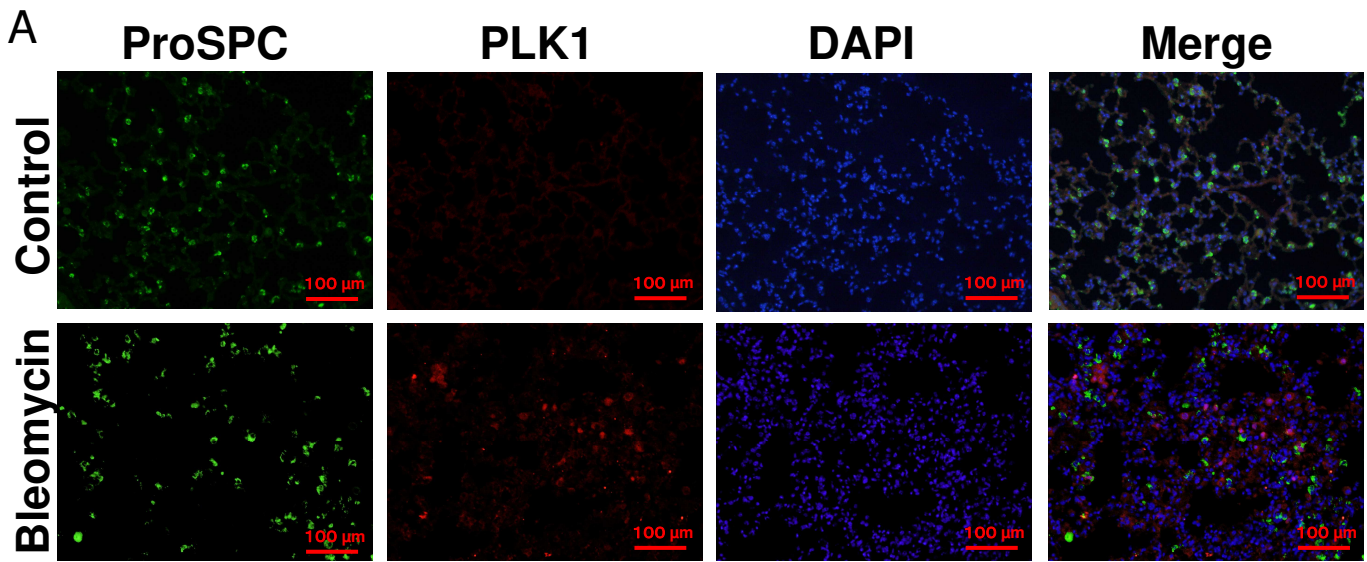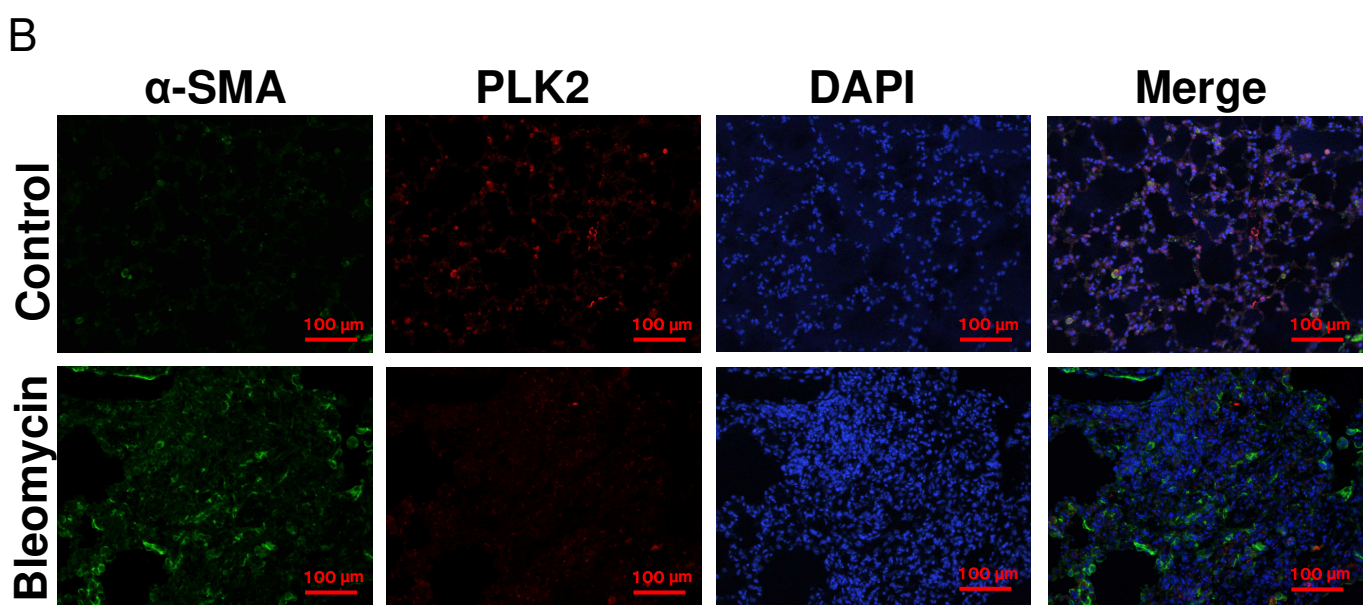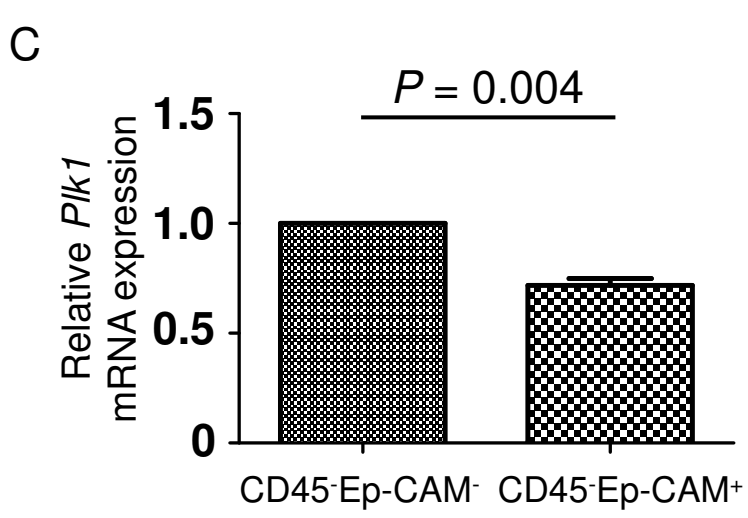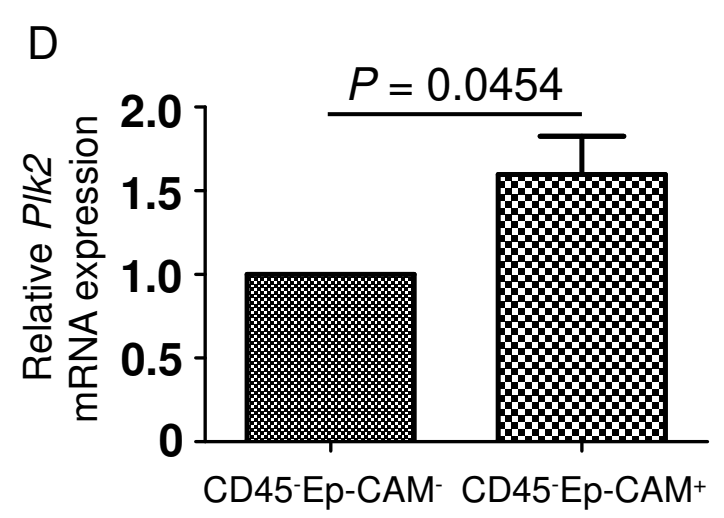

Figure E2

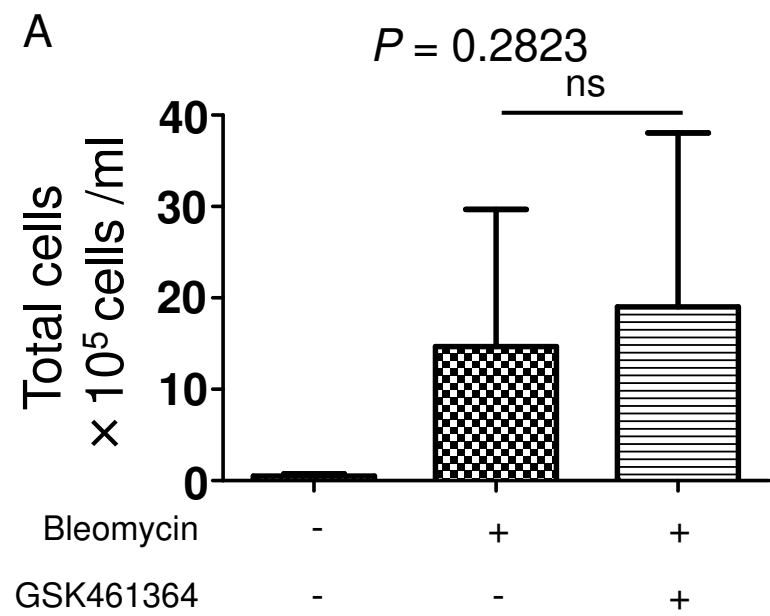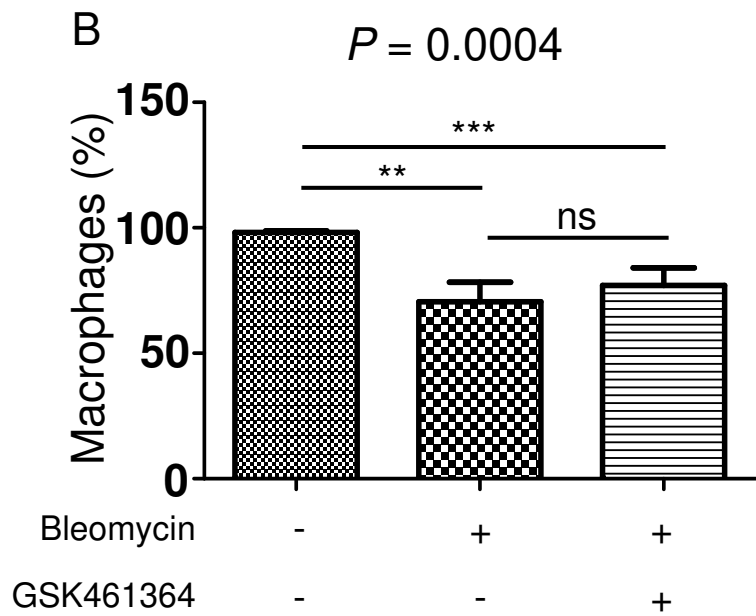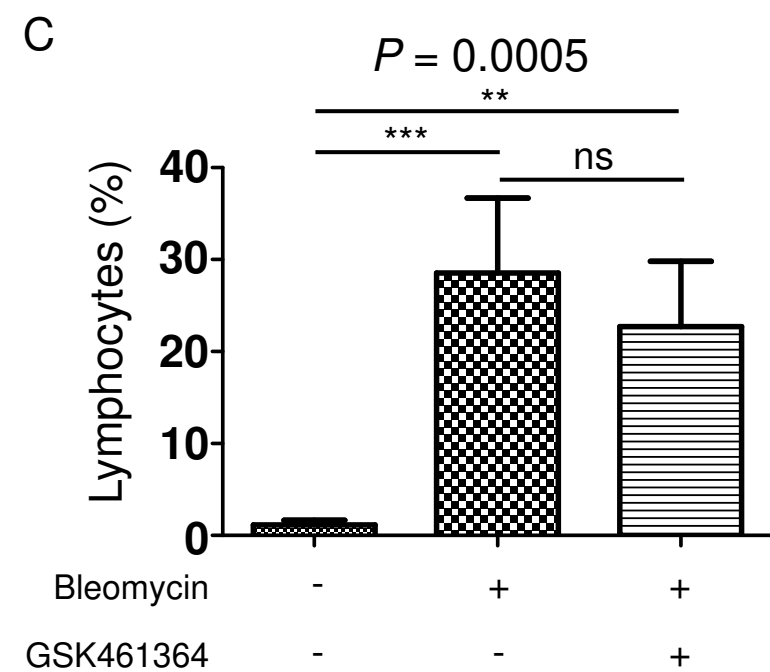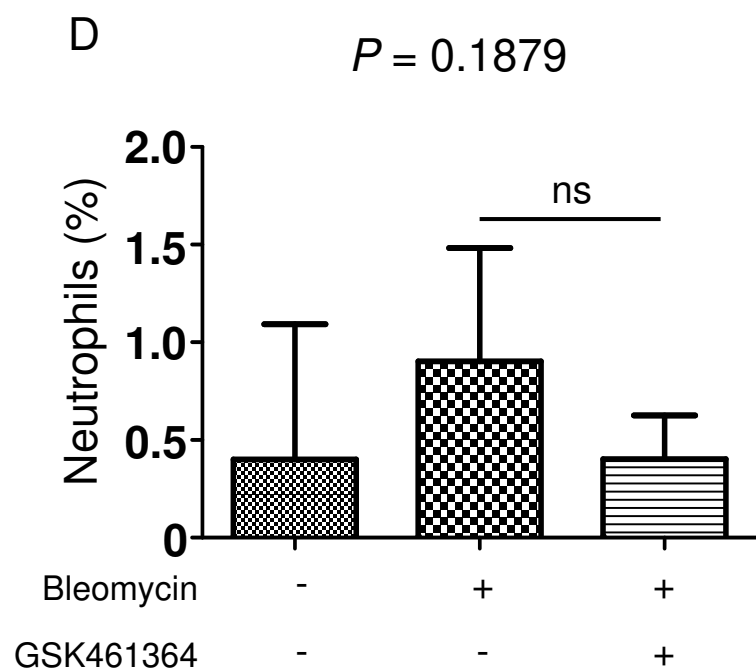

Figure E3

A

**Genes suppressed by BI2536**

*CCL2, COL1A1, COL1A2, COL3A1, COL5A1, COL5A2, COL6A1, CXCL12, CXCL14, DMD, EIF4B, FHL2, HOXB2, IFITM1, KRT17, LY6D, S100A2, SFRP1, VCAM1*

**Genes upregulated by BI2536**

*C4BPA, CACNA2D2, CAMK2N1, CD36, CYP51A1, DHCR24, EPAS1, ETV5, FADS1, FDPS, HMOX1, INSIG1, LAMP3, LDLR, LSS, MLPH, PCDH9, SCD, SFTPC, TMEM41B*

B

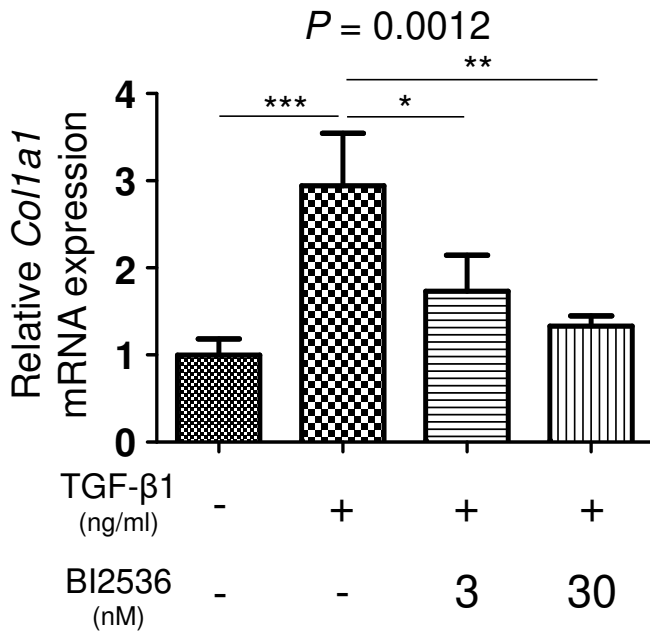

C

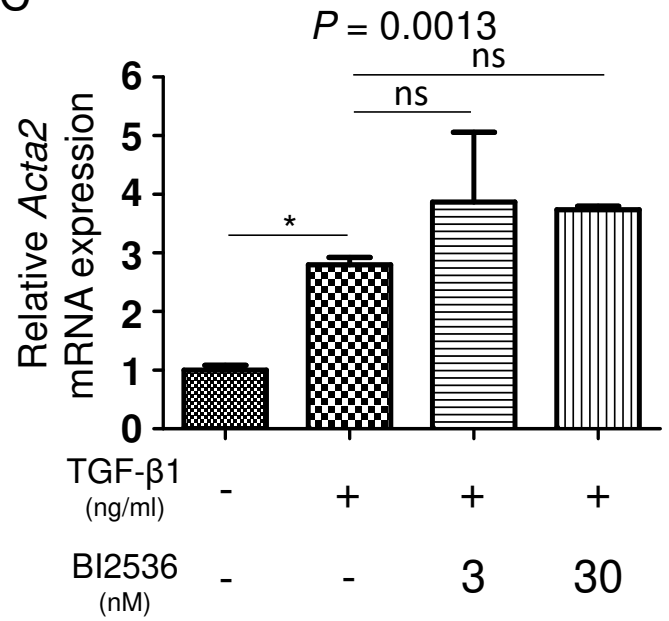

D

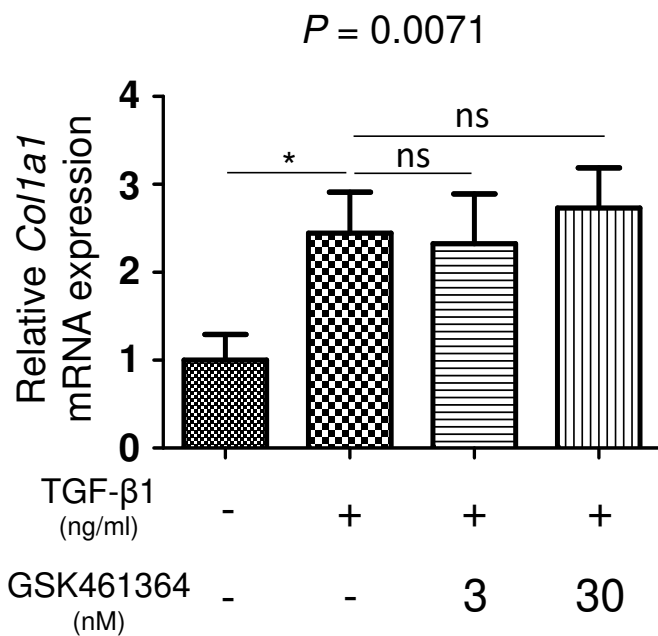

E

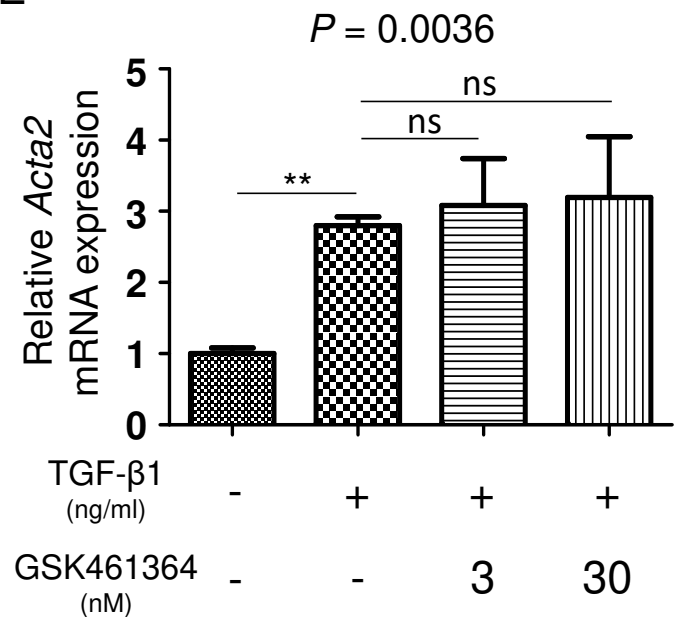

Figure E4

# PLK1

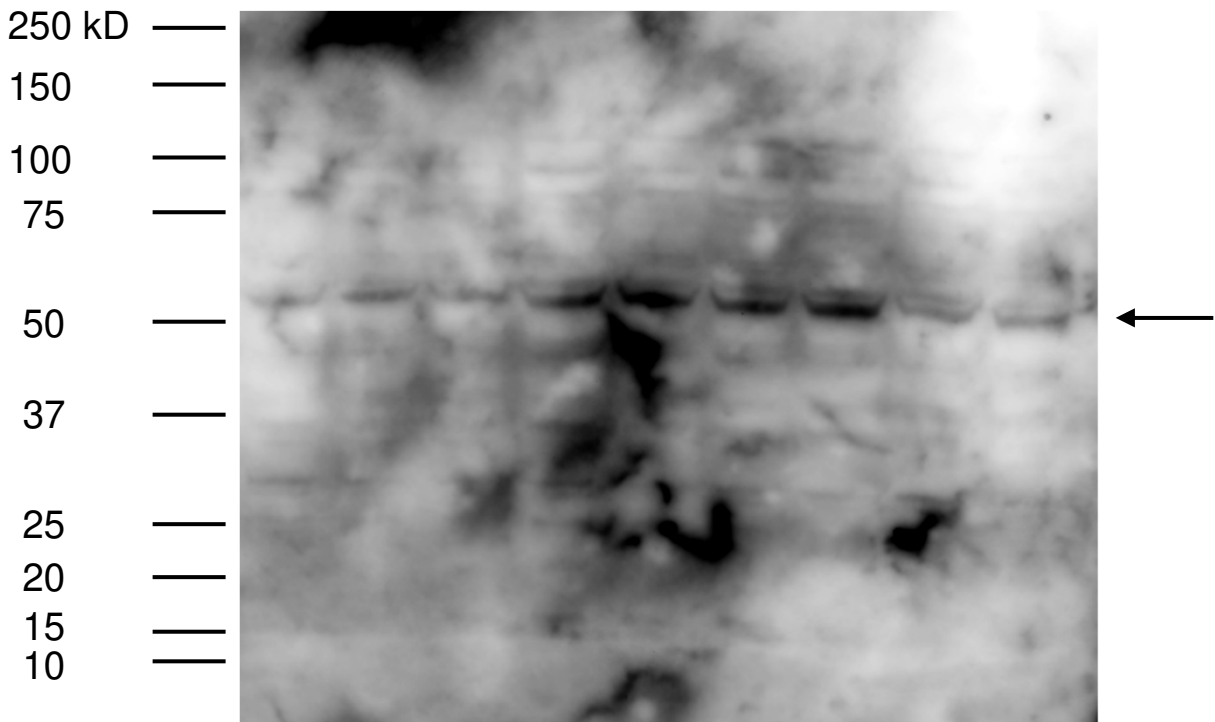

# $\beta$ -actin

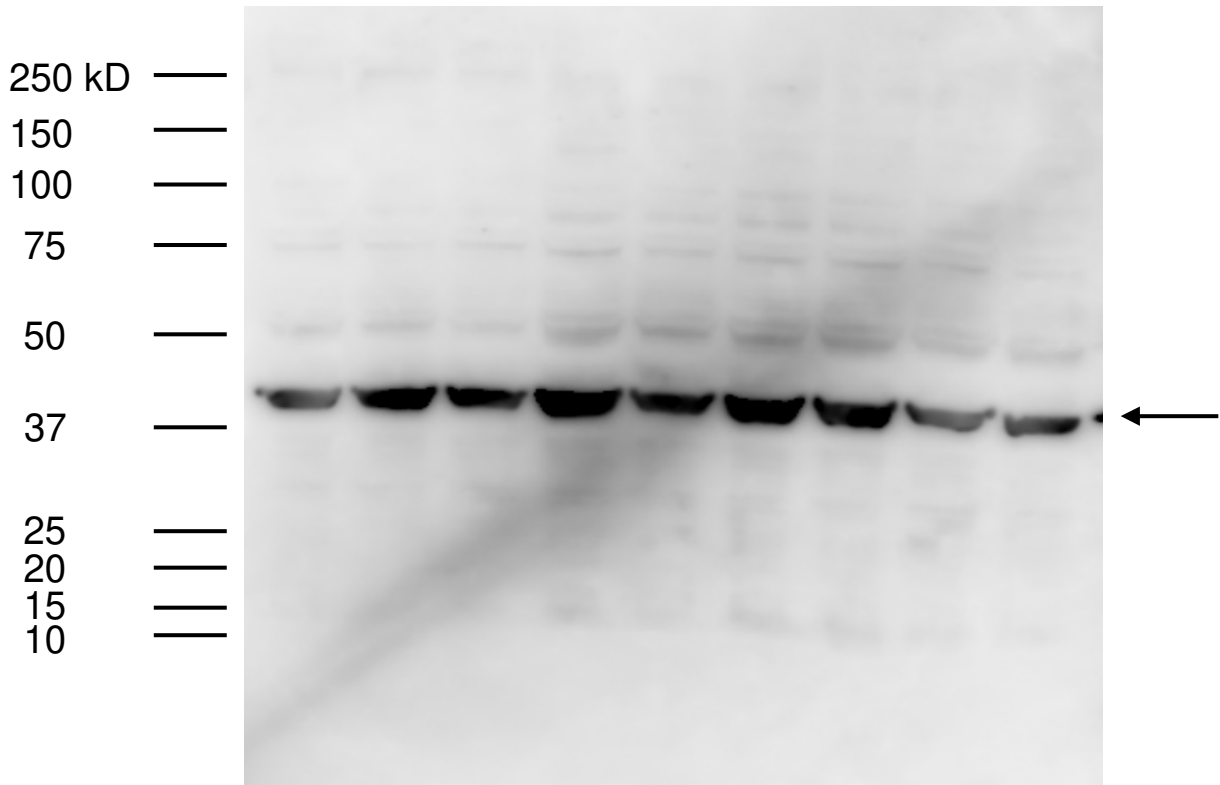

Figure E5

PLK2

250 kD —  
150 —  
100 —  
75 —  
50 —  
37 —  
  
25 —  
20 —  
15 —  
10 —

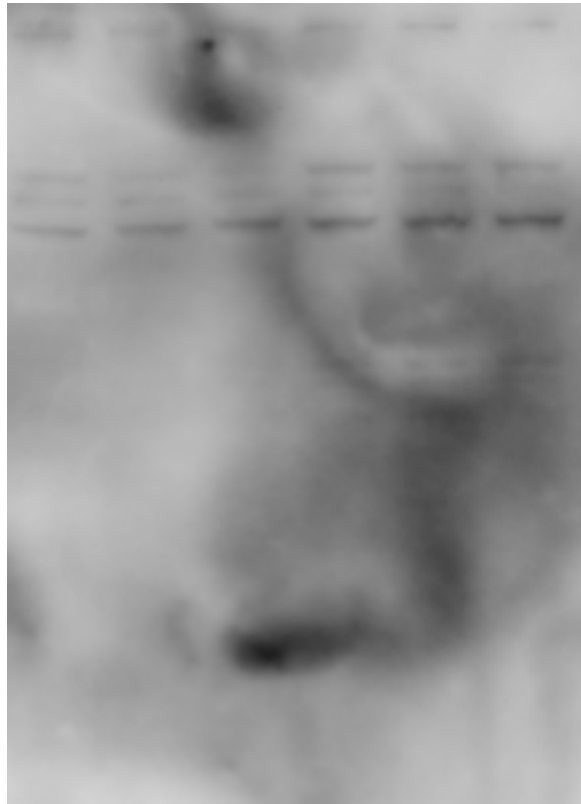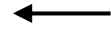

$\beta$ -actin

250 kD —  
150 —  
100 —  
75 —  
50 —  
37 —  
  
25 —  
20 —  
15 —  
10 —

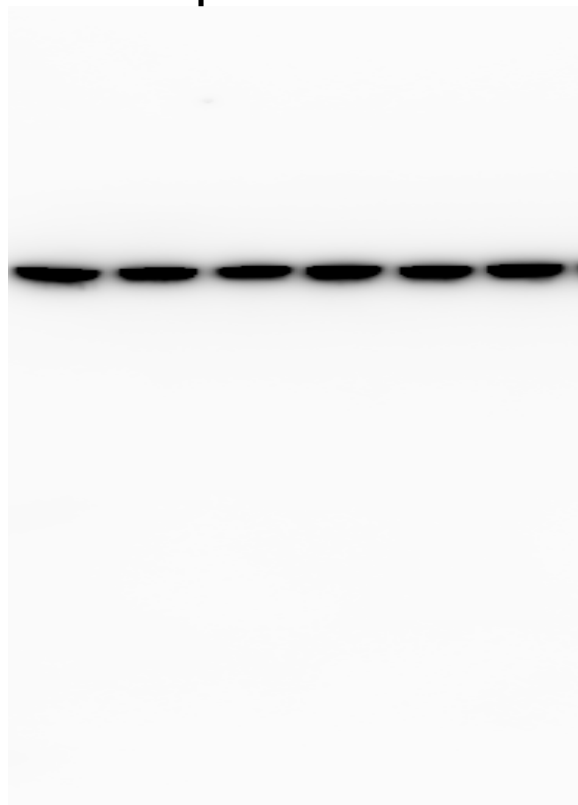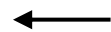

Figure E6
